# Supplementary figures and images for: Validation of an automated delirium prediction model (DElirium MOdel (DEMO)): an observational study
Source: PubMed Central journal article supplement — BMJ Open. 2017 Nov 8;7(11):e016654. doi: 10.1136/bmjopen-2017-016654 (PMC5695379; doi:10.1136/bmjopen-2017-016654), 2017-11-08

Figure 1. Flow diagram inclusion

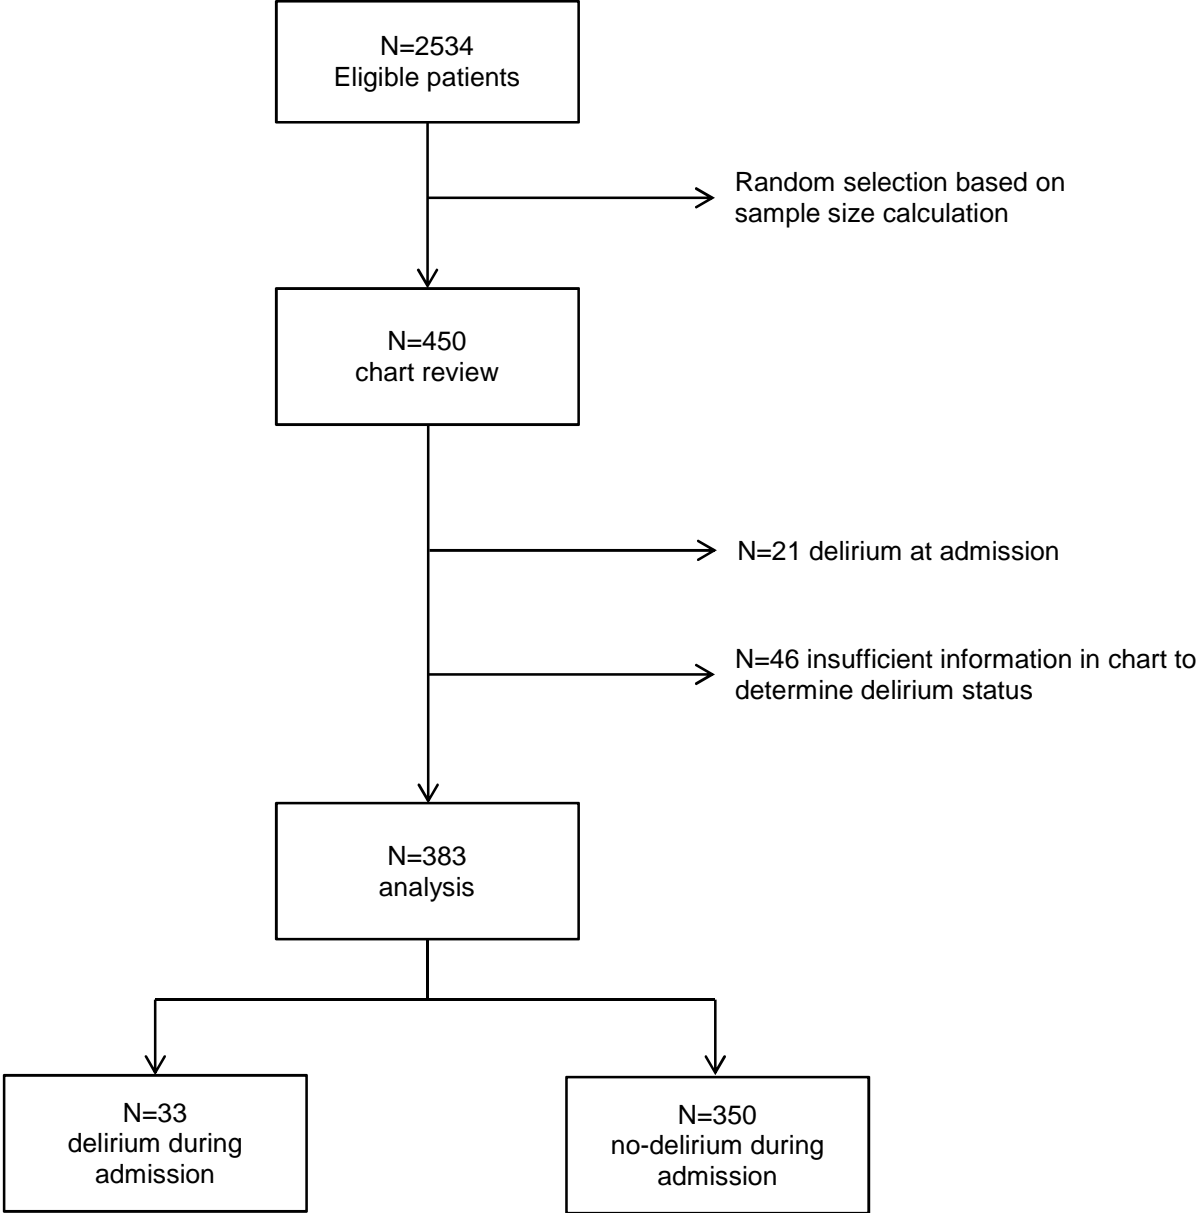

Supplement: bmjopen-2017-016654supp001.pdf [file bmjopen-2017-016654supp001.pdf]
